# Supplementary material
Source: PubMed Central journal article supplement (PMC3273671)
Supplement: NIHMS350967-supplement-1_si_001.pdf [file NIHMS350967-supplement-1_si_001.pdf]

## Supporting Information

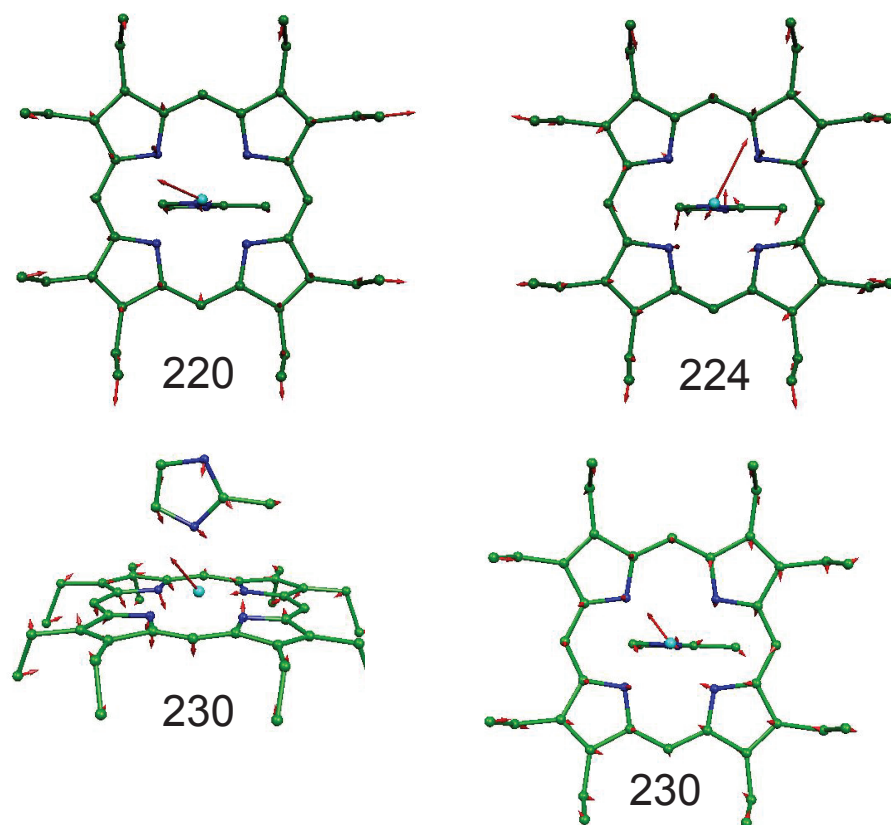

**Figure S1.** Three DFT-predicted in-plane Fe modes contributing to the experimental feature at  $228\text{ cm}^{-1}$  in  $[\text{Fe}(\text{OEP})(2\text{-MeHIm})]$ . The  $230\text{ cm}^{-1}$  mode has both in-plane and out-of-plane motion as shown in bottom pair of diagrams, which contributes to the experimental features at  $231\text{ cm}^{-1}$ .

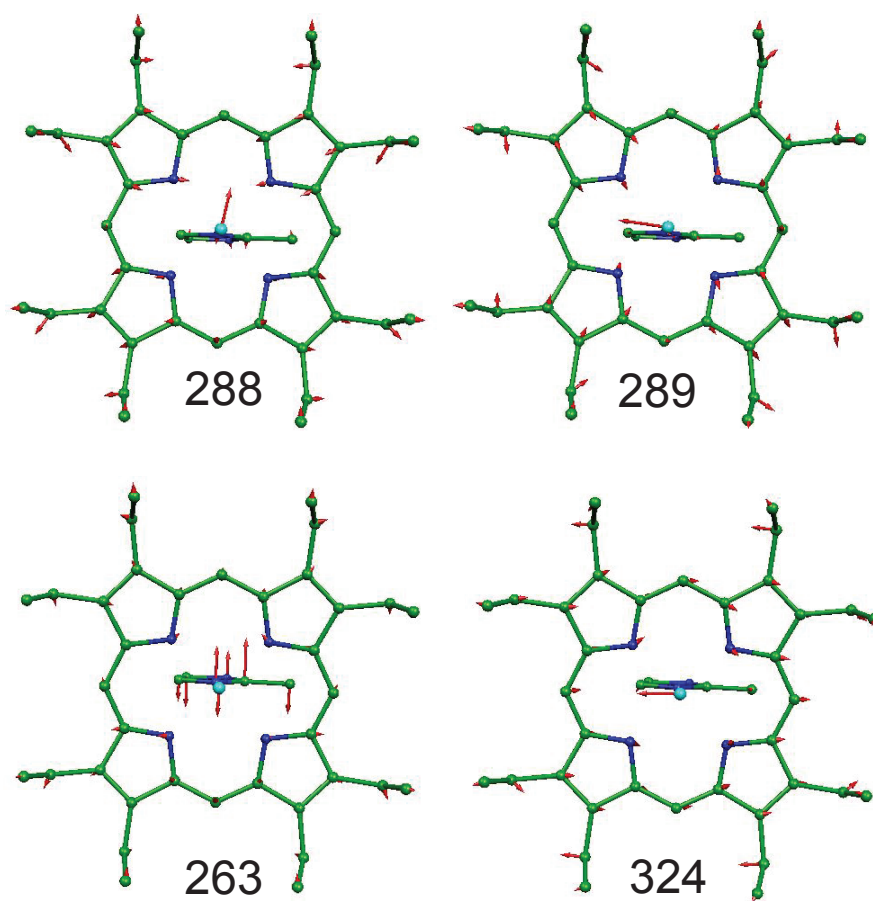

**Figure S2.** Other modes with significant in-plane Fe motion from the B3LYP calculations on Three DFT-predicted out-of-plane Fe modes contributing to the experimental feature at  $220\text{ cm}^{-1}$  in  $[\text{Fe}(\text{OEP})(2\text{-MeHIm})]$ . .

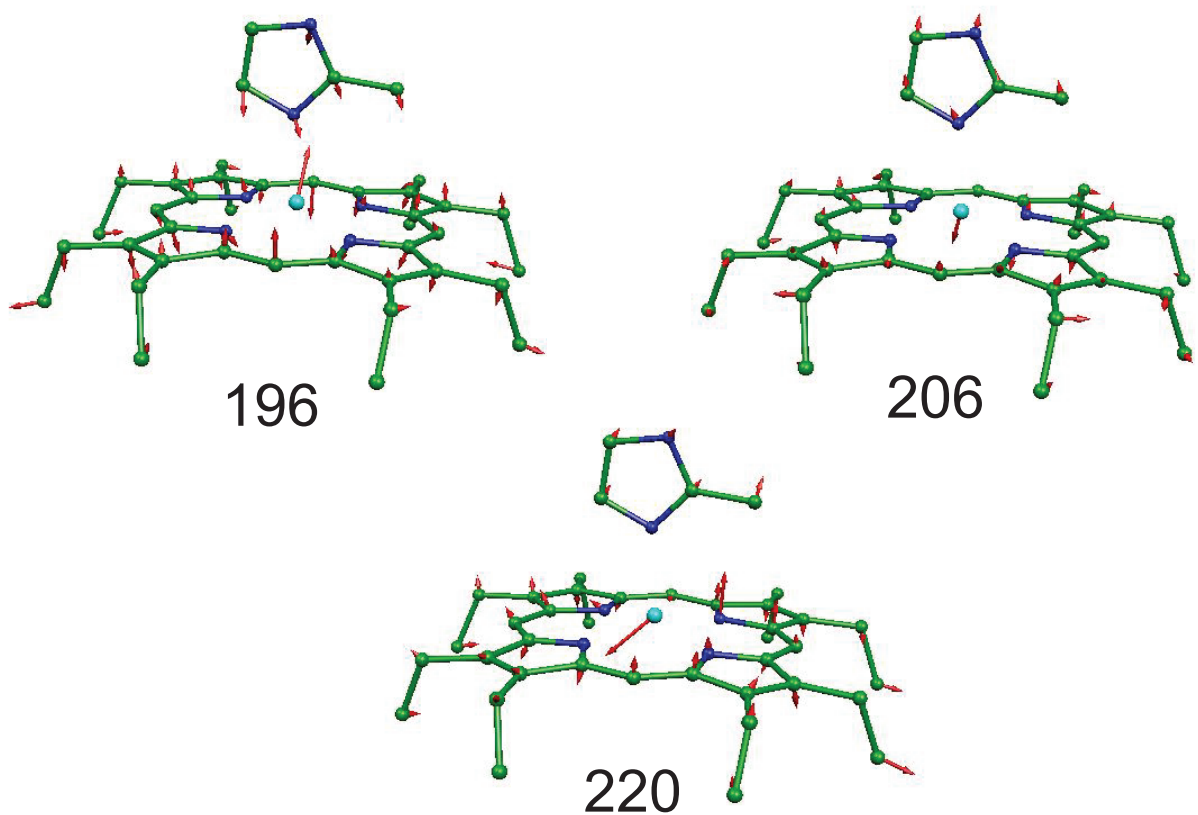

**Figure S3.** Three DFT-predicted out-of-plane Fe modes contributing to the experimental feature at 220 cm<sup>-1</sup> in [Fe(OEP)(2-MeHIm)].

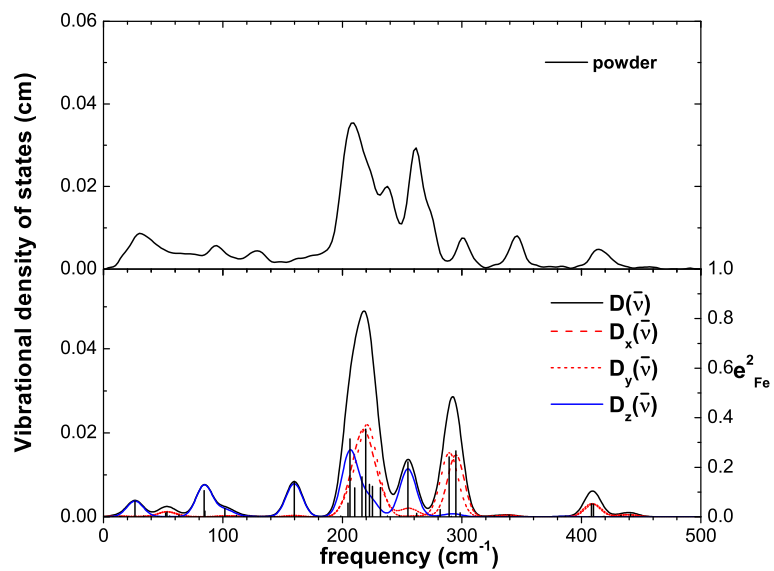

**Figure S4.** Comparison of the experimental VDOS determined from NRVS measurements on [Fe(TPP)(1,2-Me<sub>2</sub>Im)] (upper panel) with the VDOS predicted on the basis of DFT calculations (lower panel). The spectra in the top panel have been normalized so that the following relationship is followed:  $D(\bar{\nu}) = D_{\text{ip}}(\bar{\nu}) + D_{\text{oop}}(\bar{\nu})$ .

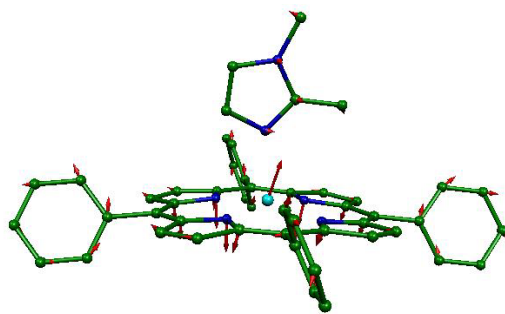

254

**Figure S5.** The out-of-plane Fe mode, predicted at  $254\text{ cm}^{-1}$ , contributing to the experimental feature at  $238\text{ cm}^{-1}$  in  $[\text{Fe}(\text{TPP})(1,2\text{-Me}_2\text{Im})]$ .

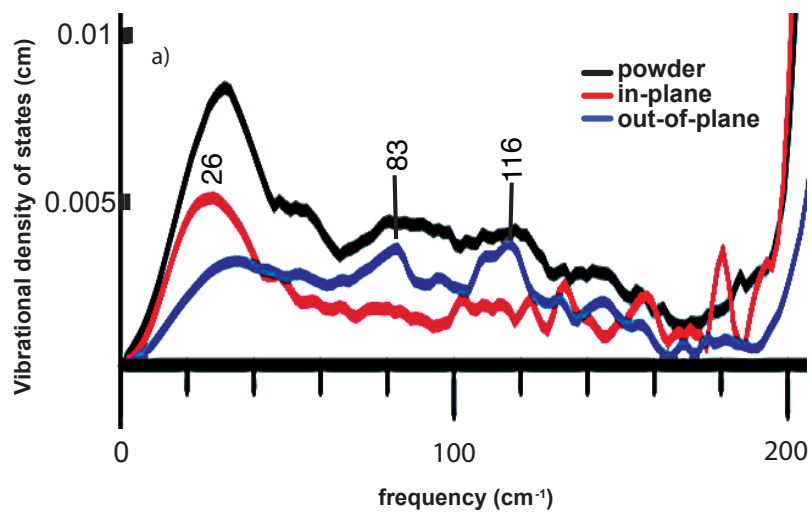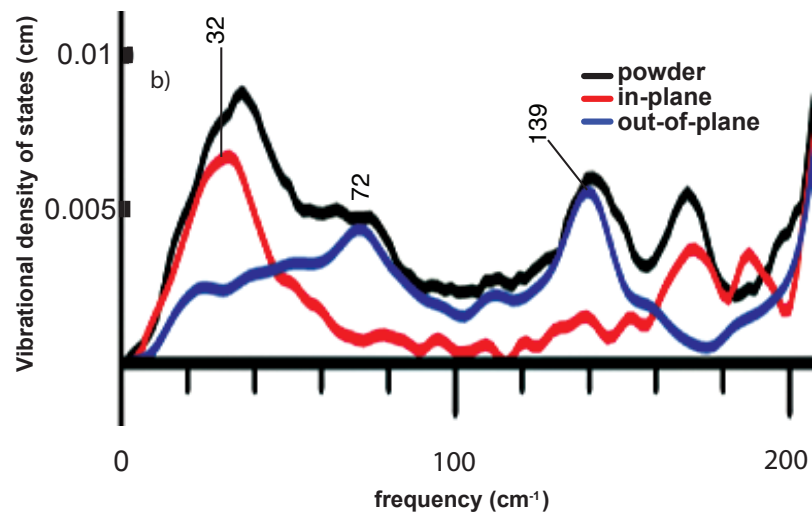

**Figure S6.** Expanded view of the 0 – 200 cm<sup>-1</sup> region for (top) [Fe(TPP)(2-MeHIm)] and (bottom) that for [Fe(OEP)(2-MeHIm)].

## Captions for Supporting Information Figures and Tables

Figure S1. Three DFT-predicted in-plane Fe modes contributing to the experimental feature at  $228\text{ cm}^{-1}$  in  $[\text{Fe}(\text{OEP})(2\text{-MeHIm})]$ . The  $230\text{ cm}^{-1}$  mode has both in-plane and out-of-plane motion as shown in bottom pair of diagrams, which contributes to the experimental features at  $231\text{ cm}^{-1}$ .

Figure S2. Other modes with significant in-plane Fe motion from the B3LYP calculations on  $[\text{Fe}(\text{OEP})(2\text{-MeHIm})]$ .

Figure S3. Three DFT-predicted out-of-plane Fe modes contributing to the experimental feature at  $220\text{ cm}^{-1}$  in  $[\text{Fe}(\text{OEP})(2\text{-MeHIm})]$ .

Figure S4. Comparison of the experimental VDOS determined from NRVS measurements on  $[\text{Fe}(\text{TPP})(1,2\text{-Me}_2\text{Im})]$  (upper panel) with the VDOS predicted on the basis of DFT calculations (lower panel). The spectra in the top panel have been normalized so that the following relationship is followed:  $D(\bar{\nu}) = D_{\text{ip}}(\bar{\nu}) + D_{\text{oop}}(\bar{\nu})$ .

Figure S5. The out-of-plane Fe mode, predicted at  $254\text{ cm}^{-1}$ , contributing to the experimental feature at  $238\text{ cm}^{-1}$  in  $[\text{Fe}(\text{TPP})(1,2\text{-Me}_2\text{Im})]$ .

Figure S6. expanded scale

Table S1. Predicted  $e_{Fe}^2$  values for four calculated compounds.

Table S2. Optimized Cartesian Coordinate (pdb format) for  $[\text{Fe}(\text{OEP})(2\text{-MeHIm})]$

Table S3. Optimized Cartesian Coordinate (pdb format) for [Fe(OEP)(1,2-Me<sub>2</sub>Im)]

Table S4. Optimized Cartesian Coordinate (pdb format) for [Fe(TPP)(2-MeHIm)]

Table S5. Optimized Cartesian Coordinate (pdb format) for [Fe(TPP)(1,2-Me<sub>2</sub>Im)]



**Table S1.** Predicted frequencies and  $e_{Fe}^2$  values for four calculated compounds

| [Fe(TPP)(2-MeHIm)] |            | [Fe(TPP)(1,2-Me <sub>2</sub> Im)] |            | [Fe(OEP)(2-MeHIm)] |            | [Fe(OEP)(1,2-Me <sub>2</sub> Im)] |            |
|--------------------|------------|-----------------------------------|------------|--------------------|------------|-----------------------------------|------------|
| frequency          | $e_{Fe}^2$ | frequency                         | $e_{Fe}^2$ | frequency          | $e_{Fe}^2$ | frequency                         | $e_{Fe}^2$ |
| 27                 | 0.03       | 26                                | 0.06       | 36                 | 0.08       | 31                                | 0.03       |
| 28                 | 0.03       | 52                                | 0.02       | 39                 | 0.03       | 33                                | 0.06       |
| 52                 | 0.02       | 53                                | 0.02       | 116                | 0.06       | 37                                | 0.03       |
| 53                 | 0.02       | 84                                | 0.11       | 128                | 0.02       | 115                               | 0.06       |
| 83                 | 0.08       | 85                                | 0.02       | 160                | 0.02       | 157                               | 0.03       |
| 87                 | 0.07       | 102                               | 0.03       | 160                | 0.02       | 158                               | 0.03       |
| 125                | 0.02       | 160                               | 0.14       | 160                | 0.04       | 173                               | 0.30       |
| 163                | 0.06       | 205                               | 0.05       | 180                | 0.06       | 175                               | 0.02       |
| 197                | 0.07       | 206                               | 0.31       | 196                | 0.15       | 204                               | 0.02       |
| 201                | 0.14       | 210                               | 0.12       | 206                | 0.05       | 211                               | 0.02       |
| 203                | 0.09       | 216                               | 0.16       | 220                | 0.21       | 214                               | 0.10       |
| 212                | 0.17       | 220                               | 0.35       | 224                | 0.36       | 219                               | 0.06       |
| 215                | 0.02       | 223                               | 0.13       | 230                | 0.40       | 221                               | 0.29       |
| 220                | 0.28       | 225                               | 0.12       | 243                | 0.02       | 224                               | 0.05       |
| 222                | 0.36       | 232                               | 0.12       | 249                | 0.02       | 233                               | 0.43       |
| 223                | 0.06       | 255                               | 0.22       | 252                | 0.02       | 238                               | 0.02       |
| 228                | 0.21       | 282                               | 0.03       | 263                | 0.06       | 240                               | 0.04       |
| 242                | 0.02       | 289                               | 0.24       | 280                | 0.05       | 247                               | 0.04       |
| 247                | 0.02       | 295                               | 0.27       | 288                | 0.18       | 254                               | 0.16       |
| 262                | 0.04       | 299                               | 0.02       | 289                | 0.27       | 276                               | 0.48       |
| 266                | 0.21       | 408                               | 0.05       | 320                | 0.02       | 280                               | 0.03       |
| 292                | 0.27       | 410                               | 0.05       | 321                | 0.03       | 281                               | 0.18       |
| 295                | 0.25       |                                   |            | 324                | 0.21       | 337                               | 0.02       |
| 298                | 0.02       |                                   |            | 341                | 0.02       | 340                               | 0.04       |
| 408                | 0.06       |                                   |            |                    |            | 352                               | 0.03       |
| 411                | 0.05       |                                   |            |                    |            |                                   |            |

| HEADER                                                |    |     |     |   |   |        |        |        |      |      |
|-------------------------------------------------------|----|-----|-----|---|---|--------|--------|--------|------|------|
| CRYST1 1.0000 1.0000 1.0000 90.00 90.00 90.00 Unknown |    |     |     |   |   |        |        |        |      |      |
| SCALE1 1.000000 -0.000000 -0.000000 0.000000          |    |     |     |   |   |        |        |        |      |      |
| SCALE2 0.000000 1.000000 -0.000000 0.000000           |    |     |     |   |   |        |        |        |      |      |
| SCALE3 0.000000 0.000000 1.000000 0.000000            |    |     |     |   |   |        |        |        |      |      |
| HETATM                                                | 1  | Fe1 | UNK | 0 | 1 | 0.017  | 0.007  | 0.339  | 1.00 | 0.00 |
| HETATM                                                | 2  | N2  | UNK | 0 | 1 | -1.463 | 1.450  | -0.040 | 1.00 | 0.00 |
| HETATM                                                | 3  | N3  | UNK | 0 | 1 | 1.469  | 1.474  | -0.052 | 1.00 | 0.00 |
| HETATM                                                | 4  | N4  | UNK | 0 | 1 | 1.486  | -1.445 | -0.073 | 1.00 | 0.00 |
| HETATM                                                | 5  | N5  | UNK | 0 | 1 | -1.435 | -1.464 | -0.061 | 1.00 | 0.00 |
| HETATM                                                | 6  | C6  | UNK | 0 | 1 | -2.812 | 1.240  | -0.138 | 1.00 | 0.00 |
| HETATM                                                | 7  | C7  | UNK | 0 | 1 | -1.265 | 2.803  | -0.095 | 1.00 | 0.00 |
| HETATM                                                | 8  | C8  | UNK | 0 | 1 | 1.252  | 2.824  | -0.095 | 1.00 | 0.00 |
| HETATM                                                | 9  | C9  | UNK | 0 | 1 | 2.821  | 1.284  | -0.124 | 1.00 | 0.00 |
| HETATM                                                | 10 | C10 | UNK | 0 | 1 | 2.837  | -1.232 | -0.130 | 1.00 | 0.00 |
| HETATM                                                | 11 | C11 | UNK | 0 | 1 | 1.294  | -2.798 | -0.118 | 1.00 | 0.00 |
| HETATM                                                | 12 | C12 | UNK | 0 | 1 | -1.220 | -2.815 | -0.114 | 1.00 | 0.00 |
| HETATM                                                | 13 | C13 | UNK | 0 | 1 | -2.789 | -1.274 | -0.144 | 1.00 | 0.00 |
| HETATM                                                | 14 | C14 | UNK | 0 | 1 | -3.513 | 2.516  | -0.230 | 1.00 | 0.00 |
| HETATM                                                | 15 | C15 | UNK | 0 | 1 | -2.545 | 3.493  | -0.203 | 1.00 | 0.00 |
| HETATM                                                | 16 | C16 | UNK | 0 | 1 | 2.524  | 3.533  | -0.180 | 1.00 | 0.00 |
| HETATM                                                | 17 | C17 | UNK | 0 | 1 | 3.506  | 2.570  | -0.201 | 1.00 | 0.00 |
| HETATM                                                | 18 | C18 | UNK | 0 | 1 | 3.543  | -2.507 | -0.201 | 1.00 | 0.00 |
| HETATM                                                | 19 | C19 | UNK | 0 | 1 | 2.578  | -3.486 | -0.199 | 1.00 | 0.00 |
| HETATM                                                | 20 | C20 | UNK | 0 | 1 | -2.491 | -3.523 | -0.209 | 1.00 | 0.00 |
| HETATM                                                | 21 | C21 | UNK | 0 | 1 | -3.472 | -2.559 | -0.232 | 1.00 | 0.00 |
| HETATM                                                | 22 | C22 | UNK | 0 | 1 | -0.011 | 3.429  | -0.086 | 1.00 | 0.00 |
| HETATM                                                | 23 | H23 | UNK | 0 | 1 | -0.020 | 4.514  | -0.117 | 1.00 | 0.00 |
| HETATM                                                | 24 | C24 | UNK | 0 | 1 | 3.448  | 0.030  | -0.133 | 1.00 | 0.00 |
| HETATM                                                | 25 | H25 | UNK | 0 | 1 | 4.533  | 0.037  | -0.177 | 1.00 | 0.00 |
| HETATM                                                | 26 | C26 | UNK | 0 | 1 | 0.042  | -3.424 | -0.111 | 1.00 | 0.00 |
| HETATM                                                | 27 | H27 | UNK | 0 | 1 | 0.049  | -4.510 | -0.142 | 1.00 | 0.00 |
| HETATM                                                | 28 | C28 | UNK | 0 | 1 | -3.420 | -0.023 | -0.160 | 1.00 | 0.00 |
| HETATM                                                | 29 | H29 | UNK | 0 | 1 | -4.504 | -0.033 | -0.225 | 1.00 | 0.00 |
| HETATM                                                | 30 | C30 | UNK | 0 | 1 | -5.000 | 2.685  | -0.374 | 1.00 | 0.00 |
| HETATM                                                | 31 | H31 | UNK | 0 | 1 | -5.290 | 3.686  | -0.031 | 1.00 | 0.00 |
| HETATM                                                | 32 | H32 | UNK | 0 | 1 | -5.521 | 1.979  | 0.288  | 1.00 | 0.00 |
| HETATM                                                | 33 | C33 | UNK | 0 | 1 | -5.510 | 2.484  | -1.815 | 1.00 | 0.00 |
| HETATM                                                | 34 | H34 | UNK | 0 | 1 | -6.598 | 2.612  | -1.868 | 1.00 | 0.00 |
| HETATM                                                | 35 | H35 | UNK | 0 | 1 | -5.265 | 1.482  | -2.184 | 1.00 | 0.00 |
| HETATM                                                | 36 | H36 | UNK | 0 | 1 | -5.048 | 3.207  | -2.497 | 1.00 | 0.00 |
| HETATM                                                | 37 | C37 | UNK | 0 | 1 | -2.729 | 4.982  | -0.312 | 1.00 | 0.00 |
| HETATM                                                | 38 | H38 | UNK | 0 | 1 | -2.023 | 5.494  | 0.356  | 1.00 | 0.00 |
| HETATM                                                | 39 | H39 | UNK | 0 | 1 | -3.730 | 5.254  | 0.046  | 1.00 | 0.00 |
| HETATM                                                | 40 | C40 | UNK | 0 | 1 | -2.547 | 5.526  | -1.743 | 1.00 | 0.00 |
| HETATM                                                | 41 | H41 | UNK | 0 | 1 | -2.679 | 6.615  | -1.768 | 1.00 | 0.00 |
| HETATM                                                | 42 | H42 | UNK | 0 | 1 | -3.277 | 5.079  | -2.427 | 1.00 | 0.00 |
| HETATM                                                | 43 | H43 | UNK | 0 | 1 | -1.549 | 5.293  | -2.128 | 1.00 | 0.00 |
| HETATM                                                | 44 | C44 | UNK | 0 | 1 | 2.687  | 5.025  | -0.274 | 1.00 | 0.00 |
| HETATM                                                | 45 | H45 | UNK | 0 | 1 | 3.688  | 5.307  | 0.074  | 1.00 | 0.00 |
| HETATM                                                | 46 | H46 | UNK | 0 | 1 | 1.982  | 5.519  | 0.408  | 1.00 | 0.00 |
| HETATM                                                | 47 | C47 | UNK | 0 | 1 | 2.479  | 5.581  | -1.697 | 1.00 | 0.00 |
| HETATM                                                | 48 | H48 | UNK | 0 | 1 | 2.597  | 6.671  | -1.713 | 1.00 | 0.00 |
| HETATM                                                | 49 | H49 | UNK | 0 | 1 | 1.478  | 5.340  | -2.071 | 1.00 | 0.00 |
| HETATM                                                | 50 | H50 | UNK | 0 | 1 | 3.204  | 5.149  | -2.395 | 1.00 | 0.00 |
| HETATM                                                | 51 | C51 | UNK | 0 | 1 | 4.992  | 2.761  | -0.324 | 1.00 | 0.00 |
| HETATM                                                | 52 | H52 | UNK | 0 | 1 | 5.516  | 2.051  | 0.330  | 1.00 | 0.00 |

---

---

|         |    |     |     |   |   |        |        |        |      |      |
|---------|----|-----|-----|---|---|--------|--------|--------|------|------|
| HETATM  | 53 | H53 | UNK | 0 | 1 | 5.265  | 3.760  | 0.040  | 1.00 | 0.00 |
| HETATM  | 54 | C54 | UNK | 0 | 1 | 5.519  | 2.596  | -1.764 | 1.00 | 0.00 |
| HETATM  | 55 | H55 | UNK | 0 | 1 | 6.605  | 2.739  | -1.804 | 1.00 | 0.00 |
| HETATM  | 56 | H56 | UNK | 0 | 1 | 5.054  | 3.325  | -2.436 | 1.00 | 0.00 |
| HETATM  | 57 | H57 | UNK | 0 | 1 | 5.291  | 1.597  | -2.154 | 1.00 | 0.00 |
| HETATM  | 58 | C58 | UNK | 0 | 1 | 5.034  | -2.673 | -0.303 | 1.00 | 0.00 |
| HETATM  | 59 | H59 | UNK | 0 | 1 | 5.535  | -1.942 | 0.346  | 1.00 | 0.00 |
| HETATM  | 60 | H60 | UNK | 0 | 1 | 5.321  | -3.660 | 0.082  | 1.00 | 0.00 |
| HETATM  | 61 | C61 | UNK | 0 | 1 | 5.577  | -2.518 | -1.738 | 1.00 | 0.00 |
| HETATM  | 62 | H62 | UNK | 0 | 1 | 6.667  | -2.634 | -1.760 | 1.00 | 0.00 |
| HETATM  | 63 | H63 | UNK | 0 | 1 | 5.330  | -1.532 | -2.146 | 1.00 | 0.00 |
| HETATM  | 64 | H64 | UNK | 0 | 1 | 5.141  | -3.270 | -2.405 | 1.00 | 0.00 |
| HETATM  | 65 | C65 | UNK | 0 | 1 | 2.768  | -4.974 | -0.299 | 1.00 | 0.00 |
| HETATM  | 66 | H66 | UNK | 0 | 1 | 2.066  | -5.486 | 0.374  | 1.00 | 0.00 |
| HETATM  | 67 | H67 | UNK | 0 | 1 | 3.772  | -5.240 | 0.056  | 1.00 | 0.00 |
| HETATM  | 68 | C68 | UNK | 0 | 1 | 2.583  | -5.527 | -1.727 | 1.00 | 0.00 |
| HETATM  | 69 | H69 | UNK | 0 | 1 | 2.713  | -6.615 | -1.746 | 1.00 | 0.00 |
| HETATM  | 70 | H70 | UNK | 0 | 1 | 3.313  | -5.085 | -2.415 | 1.00 | 0.00 |
| HETATM  | 71 | H71 | UNK | 0 | 1 | 1.585  | -5.295 | -2.113 | 1.00 | 0.00 |
| HETATM  | 72 | C72 | UNK | 0 | 1 | -2.654 | -5.014 | -0.313 | 1.00 | 0.00 |
| HETATM  | 73 | H73 | UNK | 0 | 1 | -3.658 | -5.297 | 0.027  | 1.00 | 0.00 |
| HETATM  | 74 | H74 | UNK | 0 | 1 | -1.954 | -5.514 | 0.370  | 1.00 | 0.00 |
| HETATM  | 75 | C75 | UNK | 0 | 1 | -2.439 | -5.563 | -1.738 | 1.00 | 0.00 |
| HETATM  | 76 | H76 | UNK | 0 | 1 | -2.557 | -6.653 | -1.761 | 1.00 | 0.00 |
| HETATM  | 77 | H77 | UNK | 0 | 1 | -1.436 | -5.319 | -2.105 | 1.00 | 0.00 |
| HETATM  | 78 | H78 | UNK | 0 | 1 | -3.160 | -5.127 | -2.438 | 1.00 | 0.00 |
| HETATM  | 79 | C79 | UNK | 0 | 1 | -4.958 | -2.751 | -0.367 | 1.00 | 0.00 |
| HETATM  | 80 | H80 | UNK | 0 | 1 | -5.487 | -2.035 | 0.277  | 1.00 | 0.00 |
| HETATM  | 81 | H81 | UNK | 0 | 1 | -5.234 | -3.746 | 0.002  | 1.00 | 0.00 |
| HETATM  | 82 | C82 | UNK | 0 | 1 | -5.472 | -2.594 | -1.812 | 1.00 | 0.00 |
| HETATM  | 83 | H83 | UNK | 0 | 1 | -6.559 | -2.734 | -1.859 | 1.00 | 0.00 |
| HETATM  | 84 | H84 | UNK | 0 | 1 | -5.004 | -3.330 | -2.475 | 1.00 | 0.00 |
| HETATM  | 85 | H85 | UNK | 0 | 1 | -5.238 | -1.600 | -2.207 | 1.00 | 0.00 |
| HETATM  | 86 | N86 | UNK | 0 | 1 | 0.180  | -0.002 | 2.503  | 1.00 | 0.00 |
| HETATM  | 87 | C87 | UNK | 0 | 1 | -0.739 | -0.026 | 3.460  | 1.00 | 0.00 |
| HETATM  | 88 | N88 | UNK | 0 | 1 | -0.128 | -0.030 | 4.676  | 1.00 | 0.00 |
| HETATM  | 89 | H89 | UNK | 0 | 1 | -0.605 | -0.048 | 5.566  | 1.00 | 0.00 |
| HETATM  | 90 | C90 | UNK | 0 | 1 | 1.242  | -0.007 | 4.484  | 1.00 | 0.00 |
| HETATM  | 91 | H91 | UNK | 0 | 1 | 1.939  | -0.002 | 5.306  | 1.00 | 0.00 |
| HETATM  | 92 | C92 | UNK | 0 | 1 | 1.413  | 0.010  | 3.129  | 1.00 | 0.00 |
| HETATM  | 93 | H93 | UNK | 0 | 1 | 2.328  | 0.032  | 2.556  | 1.00 | 0.00 |
| HETATM  | 94 | C94 | UNK | 0 | 1 | -2.220 | -0.064 | 3.279  | 1.00 | 0.00 |
| HETATM  | 95 | H95 | UNK | 0 | 1 | -2.546 | 0.744  | 2.619  | 1.00 | 0.00 |
| HETATM  | 96 | H96 | UNK | 0 | 1 | -2.733 | 0.037  | 4.241  | 1.00 | 0.00 |
| HETATM  | 97 | H97 | UNK | 0 | 1 | -2.532 | -1.004 | 2.814  | 1.00 | 0.00 |
| CONNECT | 1  |     |     |   |   |        |        |        |      |      |
| CONNECT | 2  | 6   | 7   |   |   |        |        |        |      |      |
| CONNECT | 3  | 8   | 9   |   |   |        |        |        |      |      |
| CONNECT | 4  | 10  | 11  |   |   |        |        |        |      |      |
| CONNECT | 5  | 12  | 13  |   |   |        |        |        |      |      |
| CONNECT | 6  | 14  | 28  |   |   |        |        |        |      |      |
| CONNECT | 7  | 15  | 22  |   |   |        |        |        |      |      |
| CONNECT | 8  | 16  | 22  |   |   |        |        |        |      |      |
| CONNECT | 9  | 17  | 24  |   |   |        |        |        |      |      |
| CONNECT | 10 | 18  | 24  |   |   |        |        |        |      |      |
| CONNECT | 11 | 19  | 26  |   |   |        |        |        |      |      |
| CONNECT | 12 | 20  | 26  |   |   |        |        |        |      |      |

---

|         |    |    |    |    |
|---------|----|----|----|----|
| CONNECT | 13 | 21 | 28 |    |
| CONNECT | 14 | 15 | 30 |    |
| CONNECT | 15 | 37 |    |    |
| CONNECT | 16 | 17 | 44 |    |
| CONNECT | 17 | 51 |    |    |
| CONNECT | 18 | 19 | 58 |    |
| CONNECT | 19 | 65 |    |    |
| CONNECT | 20 | 21 | 72 |    |
| CONNECT | 21 | 79 |    |    |
| CONNECT | 22 | 23 |    |    |
| CONNECT | 23 |    |    |    |
| CONNECT | 24 | 25 |    |    |
| CONNECT | 25 |    |    |    |
| CONNECT | 26 | 27 |    |    |
| CONNECT | 27 |    |    |    |
| CONNECT | 28 | 29 |    |    |
| CONNECT | 29 |    |    |    |
| CONNECT | 30 | 31 | 32 | 33 |
| CONNECT | 31 |    |    |    |
| CONNECT | 32 |    |    |    |
| CONNECT | 33 | 34 | 35 | 36 |
| CONNECT | 34 |    |    |    |
| CONNECT | 35 |    |    |    |
| CONNECT | 36 |    |    |    |
| CONNECT | 37 | 38 | 39 | 40 |
| CONNECT | 38 |    |    |    |
| CONNECT | 39 |    |    |    |
| CONNECT | 40 | 41 | 42 | 43 |
| CONNECT | 41 |    |    |    |
| CONNECT | 42 |    |    |    |
| CONNECT | 43 |    |    |    |
| CONNECT | 44 | 45 | 46 | 47 |
| CONNECT | 45 |    |    |    |
| CONNECT | 46 |    |    |    |
| CONNECT | 47 | 48 | 49 | 50 |
| CONNECT | 48 |    |    |    |
| CONNECT | 49 |    |    |    |
| CONNECT | 50 |    |    |    |
| CONNECT | 51 | 52 | 53 | 54 |
| CONNECT | 52 |    |    |    |
| CONNECT | 53 |    |    |    |
| CONNECT | 54 | 55 | 56 | 57 |
| CONNECT | 55 |    |    |    |
| CONNECT | 56 |    |    |    |
| CONNECT | 57 |    |    |    |
| CONNECT | 58 | 59 | 60 | 61 |
| CONNECT | 59 |    |    |    |
| CONNECT | 60 |    |    |    |
| CONNECT | 61 | 62 | 63 | 64 |
| CONNECT | 62 |    |    |    |
| CONNECT | 63 |    |    |    |
| CONNECT | 64 |    |    |    |
| CONNECT | 65 | 66 | 67 | 68 |
| CONNECT | 66 |    |    |    |
| CONNECT | 67 |    |    |    |
| CONNECT | 68 | 69 | 70 | 71 |
| CONNECT | 69 |    |    |    |



| HEADER                                   |          |           |           |       |       |          |         |        |      |      |
|------------------------------------------|----------|-----------|-----------|-------|-------|----------|---------|--------|------|------|
| CSD ENTRY [Fe(OEP)(1,2-DiMeIM)] Table S3 |          |           |           |       |       |          |         |        |      |      |
| CRYST1                                   | 1.0000   | 1.0000    | 1.0000    | 90.00 | 90.00 | 90.00    | Unknown |        |      |      |
| SCALE1                                   | 1.000000 | -0.000000 | -0.000000 |       |       | 0.000000 |         |        |      |      |
| SCALE2                                   | 0.000000 | 1.000000  | -0.000000 |       |       | 0.000000 |         |        |      |      |
| SCALE3                                   | 0.000000 | 0.000000  | 1.000000  |       |       | 0.000000 |         |        |      |      |
| HETATM                                   | 1        | Fe1       | UNK       | 0     | 1     | 0.066    | -0.001  | -0.138 | 1.00 | 0.00 |
| HETATM                                   | 2        | C2        | UNK       | 0     | 1     | -1.137   | -0.004  | 2.887  | 1.00 | 0.00 |
| HETATM                                   | 3        | N3        | UNK       | 0     | 1     | -0.097   | -0.004  | 2.059  | 1.00 | 0.00 |
| HETATM                                   | 4        | N4        | UNK       | 0     | 1     | -0.710   | -0.011  | 4.185  | 1.00 | 0.00 |
| HETATM                                   | 5        | C5        | UNK       | 0     | 1     | 0.675    | -0.010  | 4.167  | 1.00 | 0.00 |
| HETATM                                   | 6        | H6        | UNK       | 0     | 1     | 1.253    | -0.014  | 5.079  | 1.00 | 0.00 |
| HETATM                                   | 7        | C7        | UNK       | 0     | 1     | 1.034    | -0.008  | 2.850  | 1.00 | 0.00 |
| HETATM                                   | 8        | H8        | UNK       | 0     | 1     | 2.021    | -0.011  | 2.415  | 1.00 | 0.00 |
| HETATM                                   | 9        | C9        | UNK       | 0     | 1     | -2.578   | 0.002   | 2.505  | 1.00 | 0.00 |
| HETATM                                   | 10       | H10       | UNK       | 0     | 1     | -3.100   | -0.886  | 2.884  | 1.00 | 0.00 |
| HETATM                                   | 11       | H11       | UNK       | 0     | 1     | -2.660   | 0.010   | 1.420  | 1.00 | 0.00 |
| HETATM                                   | 12       | H12       | UNK       | 0     | 1     | -3.096   | 0.886   | 2.898  | 1.00 | 0.00 |
| HETATM                                   | 13       | C13       | UNK       | 0     | 1     | -1.555   | 0.010   | 5.368  | 1.00 | 0.00 |
| HETATM                                   | 14       | H14       | UNK       | 0     | 1     | -2.293   | -0.796  | 5.328  | 1.00 | 0.00 |
| HETATM                                   | 15       | H15       | UNK       | 0     | 1     | -2.081   | 0.967   | 5.461  | 1.00 | 0.00 |
| HETATM                                   | 16       | H16       | UNK       | 0     | 1     | -0.929   | -0.133  | 6.251  | 1.00 | 0.00 |
| HETATM                                   | 17       | N17       | UNK       | 0     | 1     | 1.548    | 1.477   | -0.201 | 1.00 | 0.00 |
| HETATM                                   | 18       | N18       | UNK       | 0     | 1     | -1.332   | 1.459   | -0.674 | 1.00 | 0.00 |
| HETATM                                   | 19       | N19       | UNK       | 0     | 1     | -1.310   | -1.478  | -0.677 | 1.00 | 0.00 |
| HETATM                                   | 20       | N20       | UNK       | 0     | 1     | 1.568    | -1.460  | -0.197 | 1.00 | 0.00 |
| HETATM                                   | 21       | C21       | UNK       | 0     | 1     | 2.895    | 1.277   | -0.056 | 1.00 | 0.00 |
| HETATM                                   | 22       | C22       | UNK       | 0     | 1     | 1.345    | 2.828   | -0.261 | 1.00 | 0.00 |
| HETATM                                   | 23       | C23       | UNK       | 0     | 1     | -1.134   | 2.813   | -0.679 | 1.00 | 0.00 |
| HETATM                                   | 24       | C24       | UNK       | 0     | 1     | -2.636   | 1.241   | -1.034 | 1.00 | 0.00 |
| HETATM                                   | 25       | C25       | UNK       | 0     | 1     | -2.619   | -1.278  | -1.032 | 1.00 | 0.00 |
| HETATM                                   | 26       | C26       | UNK       | 0     | 1     | -1.095   | -2.830  | -0.677 | 1.00 | 0.00 |
| HETATM                                   | 27       | C27       | UNK       | 0     | 1     | 1.385    | -2.813  | -0.261 | 1.00 | 0.00 |
| HETATM                                   | 28       | C28       | UNK       | 0     | 1     | 2.913    | -1.242  | -0.057 | 1.00 | 0.00 |
| HETATM                                   | 29       | C29       | UNK       | 0     | 1     | 3.586    | 2.561   | -0.006 | 1.00 | 0.00 |
| HETATM                                   | 30       | C30       | UNK       | 0     | 1     | 2.618    | 3.528   | -0.132 | 1.00 | 0.00 |
| HETATM                                   | 31       | C31       | UNK       | 0     | 1     | -2.376   | 3.496   | -1.022 | 1.00 | 0.00 |
| HETATM                                   | 32       | C32       | UNK       | 0     | 1     | -3.312   | 2.515   | -1.248 | 1.00 | 0.00 |
| HETATM                                   | 33       | C33       | UNK       | 0     | 1     | -3.279   | -2.561  | -1.239 | 1.00 | 0.00 |
| HETATM                                   | 34       | C34       | UNK       | 0     | 1     | -2.329   | -3.529  | -1.013 | 1.00 | 0.00 |
| HETATM                                   | 35       | C35       | UNK       | 0     | 1     | 2.668    | -3.497  | -0.139 | 1.00 | 0.00 |
| HETATM                                   | 36       | C36       | UNK       | 0     | 1     | 3.622    | -2.516  | -0.014 | 1.00 | 0.00 |
| HETATM                                   | 37       | C37       | UNK       | 0     | 1     | 0.099    | 3.438   | -0.454 | 1.00 | 0.00 |
| HETATM                                   | 38       | H38       | UNK       | 0     | 1     | 0.098    | 4.523   | -0.484 | 1.00 | 0.00 |
| HETATM                                   | 39       | C39       | UNK       | 0     | 1     | -3.222   | -0.022  | -1.190 | 1.00 | 0.00 |
| HETATM                                   | 40       | H40       | UNK       | 0     | 1     | -4.265   | -0.030  | -1.490 | 1.00 | 0.00 |
| HETATM                                   | 41       | C41       | UNK       | 0     | 1     | 0.146    | -3.439  | -0.453 | 1.00 | 0.00 |
| HETATM                                   | 42       | H42       | UNK       | 0     | 1     | 0.159    | -4.524  | -0.483 | 1.00 | 0.00 |
| HETATM                                   | 43       | C43       | UNK       | 0     | 1     | 3.513    | 0.022   | 0.026  | 1.00 | 0.00 |
| HETATM                                   | 44       | H44       | UNK       | 0     | 1     | 4.592    | 0.030   | 0.147  | 1.00 | 0.00 |
| HETATM                                   | 45       | C45       | UNK       | 0     | 1     | 5.073    | 2.745   | 0.117  | 1.00 | 0.00 |
| HETATM                                   | 46       | H46       | UNK       | 0     | 1     | 5.480    | 2.021   | 0.836  | 1.00 | 0.00 |
| HETATM                                   | 47       | H47       | UNK       | 0     | 1     | 5.285    | 3.736   | 0.539  | 1.00 | 0.00 |
| HETATM                                   | 48       | C48       | UNK       | 0     | 1     | 5.829    | 2.603   | -1.219 | 1.00 | 0.00 |
| HETATM                                   | 49       | H49       | UNK       | 0     | 1     | 5.662    | 1.615   | -1.663 | 1.00 | 0.00 |
| HETATM                                   | 50       | H50       | UNK       | 0     | 1     | 6.909    | 2.734   | -1.074 | 1.00 | 0.00 |
| HETATM                                   | 51       | H51       | UNK       | 0     | 1     | 5.489    | 3.351   | -1.943 | 1.00 | 0.00 |
| HETATM                                   | 52       | C52       | UNK       | 0     | 1     | 2.796    | 5.021   | -0.173 | 1.00 | 0.00 |

---

---

|         |     |      |     |    |   |        |        |        |      |      |
|---------|-----|------|-----|----|---|--------|--------|--------|------|------|
| HETATM  | 53  | H53  | UNK | 0  | 1 | 3.724  | 5.293  | 0.345  | 1.00 | 0.00 |
| HETATM  | 54  | H54  | UNK | 0  | 1 | 1.986  | 5.507  | 0.389  | 1.00 | 0.00 |
| HETATM  | 55  | C55  | UNK | 0  | 1 | 2.833  | 5.604  | -1.600 | 1.00 | 0.00 |
| HETATM  | 56  | H56  | UNK | 0  | 1 | 3.666  | 5.181  | -2.173 | 1.00 | 0.00 |
| HETATM  | 57  | H57  | UNK | 0  | 1 | 2.956  | 6.694  | -1.574 | 1.00 | 0.00 |
| HETATM  | 58  | H58  | UNK | 0  | 1 | 1.910  | 5.377  | -2.144 | 1.00 | 0.00 |
| HETATM  | 59  | C59  | UNK | 0  | 1 | -2.556 | 4.987  | -1.092 | 1.00 | 0.00 |
| HETATM  | 60  | H60  | UNK | 0  | 1 | -3.411 | 5.225  | -1.737 | 1.00 | 0.00 |
| HETATM  | 61  | H61  | UNK | 0  | 1 | -1.681 | 5.445  | -1.572 | 1.00 | 0.00 |
| HETATM  | 62  | C62  | UNK | 0  | 1 | -2.772 | 5.647  | 0.285  | 1.00 | 0.00 |
| HETATM  | 63  | H63  | UNK | 0  | 1 | -3.676 | 5.257  | 0.768  | 1.00 | 0.00 |
| HETATM  | 64  | H64  | UNK | 0  | 1 | -2.881 | 6.734  | 0.186  | 1.00 | 0.00 |
| HETATM  | 65  | H65  | UNK | 0  | 1 | -1.928 | 5.447  | 0.954  | 1.00 | 0.00 |
| HETATM  | 66  | C66  | UNK | 0  | 1 | -4.758 | 2.680  | -1.628 | 1.00 | 0.00 |
| HETATM  | 67  | H67  | UNK | 0  | 1 | -5.031 | 1.931  | -2.384 | 1.00 | 0.00 |
| HETATM  | 68  | H68  | UNK | 0  | 1 | -4.902 | 3.655  | -2.109 | 1.00 | 0.00 |
| HETATM  | 69  | C69  | UNK | 0  | 1 | -5.729 | 2.564  | -0.436 | 1.00 | 0.00 |
| HETATM  | 70  | H70  | UNK | 0  | 1 | -5.635 | 1.589  | 0.055  | 1.00 | 0.00 |
| HETATM  | 71  | H71  | UNK | 0  | 1 | -6.769 | 2.682  | -0.764 | 1.00 | 0.00 |
| HETATM  | 72  | H72  | UNK | 0  | 1 | -5.519 | 3.335  | 0.315  | 1.00 | 0.00 |
| HETATM  | 73  | C73  | UNK | 0  | 1 | -4.724 | -2.745 | -1.612 | 1.00 | 0.00 |
| HETATM  | 74  | H74  | UNK | 0  | 1 | -4.858 | -3.724 | -2.089 | 1.00 | 0.00 |
| HETATM  | 75  | H75  | UNK | 0  | 1 | -5.011 | -2.002 | -2.368 | 1.00 | 0.00 |
| HETATM  | 76  | C76  | UNK | 0  | 1 | -5.691 | -2.639 | -0.415 | 1.00 | 0.00 |
| HETATM  | 77  | H77  | UNK | 0  | 1 | -5.467 | -3.404 | 0.336  | 1.00 | 0.00 |
| HETATM  | 78  | H78  | UNK | 0  | 1 | -6.731 | -2.771 | -0.738 | 1.00 | 0.00 |
| HETATM  | 79  | H79  | UNK | 0  | 1 | -5.607 | -1.662 | 0.073  | 1.00 | 0.00 |
| HETATM  | 80  | C80  | UNK | 0  | 1 | -2.491 | -5.023 | -1.076 | 1.00 | 0.00 |
| HETATM  | 81  | H81  | UNK | 0  | 1 | -1.613 | -5.471 | -1.560 | 1.00 | 0.00 |
| HETATM  | 82  | H82  | UNK | 0  | 1 | -3.346 | -5.273 | -1.717 | 1.00 | 0.00 |
| HETATM  | 83  | C83  | UNK | 0  | 1 | -2.692 | -5.680 | 0.304  | 1.00 | 0.00 |
| HETATM  | 84  | H84  | UNK | 0  | 1 | -1.847 | -5.468 | 0.967  | 1.00 | 0.00 |
| HETATM  | 85  | H85  | UNK | 0  | 1 | -2.789 | -6.768 | 0.209  | 1.00 | 0.00 |
| HETATM  | 86  | H86  | UNK | 0  | 1 | -3.598 | -5.299 | 0.790  | 1.00 | 0.00 |
| HETATM  | 87  | C87  | UNK | 0  | 1 | 2.866  | -4.987 | -0.186 | 1.00 | 0.00 |
| HETATM  | 88  | H88  | UNK | 0  | 1 | 2.067  | -5.485 | 0.380  | 1.00 | 0.00 |
| HETATM  | 89  | H89  | UNK | 0  | 1 | 3.801  | -5.247 | 0.325  | 1.00 | 0.00 |
| HETATM  | 90  | C90  | UNK | 0  | 1 | 2.902  | -5.565 | -1.614 | 1.00 | 0.00 |
| HETATM  | 91  | H91  | UNK | 0  | 1 | 1.972  | -5.349 | -2.151 | 1.00 | 0.00 |
| HETATM  | 92  | H92  | UNK | 0  | 1 | 3.039  | -6.653 | -1.592 | 1.00 | 0.00 |
| HETATM  | 93  | H93  | UNK | 0  | 1 | 3.725  | -5.130 | -2.192 | 1.00 | 0.00 |
| HETATM  | 94  | C94  | UNK | 0  | 1 | 5.113  | -2.679 | 0.102  | 1.00 | 0.00 |
| HETATM  | 95  | H95  | UNK | 0  | 1 | 5.342  | -3.670 | 0.514  | 1.00 | 0.00 |
| HETATM  | 96  | H96  | UNK | 0  | 1 | 5.512  | -1.955 | 0.825  | 1.00 | 0.00 |
| HETATM  | 97  | C97  | UNK | 0  | 1 | 5.861  | -2.512 | -1.236 | 1.00 | 0.00 |
| HETATM  | 98  | H98  | UNK | 0  | 1 | 5.529  | -3.259 | -1.966 | 1.00 | 0.00 |
| HETATM  | 99  | H99  | UNK | 0  | 1 | 6.942  | -2.628 | -1.098 | 1.00 | 0.00 |
| HETATM  | 100 | H100 | UNK | 0  | 1 | 5.676  | -1.524 | -1.671 | 1.00 | 0.00 |
| CONNECT | 1   |      |     |    |   |        |        |        |      |      |
| CONNECT | 2   | 3    | 4   | 9  |   |        |        |        |      |      |
| CONNECT | 3   | 7    |     |    |   |        |        |        |      |      |
| CONNECT | 4   | 5    | 13  |    |   |        |        |        |      |      |
| CONNECT | 5   | 6    | 7   |    |   |        |        |        |      |      |
| CONNECT | 6   |      |     |    |   |        |        |        |      |      |
| CONNECT | 7   | 8    |     |    |   |        |        |        |      |      |
| CONNECT | 8   |      |     |    |   |        |        |        |      |      |
| CONNECT | 9   | 10   | 11  | 12 |   |        |        |        |      |      |

---

|         |    |    |    |    |
|---------|----|----|----|----|
| CONNECT | 10 |    |    |    |
| CONNECT | 11 |    |    |    |
| CONNECT | 12 |    |    |    |
| CONNECT | 13 | 14 | 15 | 16 |
| CONNECT | 14 |    |    |    |
| CONNECT | 15 |    |    |    |
| CONNECT | 16 |    |    |    |
| CONNECT | 17 | 21 | 22 |    |
| CONNECT | 18 | 23 | 24 |    |
| CONNECT | 19 | 25 | 26 |    |
| CONNECT | 20 | 27 | 28 |    |
| CONNECT | 21 | 29 | 43 |    |
| CONNECT | 22 | 30 | 37 |    |
| CONNECT | 23 | 31 | 37 |    |
| CONNECT | 24 | 32 | 39 |    |
| CONNECT | 25 | 33 | 39 |    |
| CONNECT | 26 | 34 | 41 |    |
| CONNECT | 27 | 35 | 41 |    |
| CONNECT | 28 | 36 | 43 |    |
| CONNECT | 29 | 30 | 45 |    |
| CONNECT | 30 | 52 |    |    |
| CONNECT | 31 | 32 | 59 |    |
| CONNECT | 32 | 66 |    |    |
| CONNECT | 33 | 34 | 73 |    |
| CONNECT | 34 | 80 |    |    |
| CONNECT | 35 | 36 | 87 |    |
| CONNECT | 36 | 94 |    |    |
| CONNECT | 37 | 38 |    |    |
| CONNECT | 38 |    |    |    |
| CONNECT | 39 | 40 |    |    |
| CONNECT | 40 |    |    |    |
| CONNECT | 41 | 42 |    |    |
| CONNECT | 42 |    |    |    |
| CONNECT | 43 | 44 |    |    |
| CONNECT | 44 |    |    |    |
| CONNECT | 45 | 46 | 47 | 48 |
| CONNECT | 46 |    |    |    |
| CONNECT | 47 |    |    |    |
| CONNECT | 48 | 49 | 50 | 51 |
| CONNECT | 49 |    |    |    |
| CONNECT | 50 |    |    |    |
| CONNECT | 51 |    |    |    |
| CONNECT | 52 | 53 | 54 | 55 |
| CONNECT | 53 |    |    |    |
| CONNECT | 54 |    |    |    |
| CONNECT | 55 | 56 | 57 | 58 |
| CONNECT | 56 |    |    |    |
| CONNECT | 57 |    |    |    |
| CONNECT | 58 |    |    |    |
| CONNECT | 59 | 60 | 61 | 62 |
| CONNECT | 60 |    |    |    |
| CONNECT | 61 |    |    |    |
| CONNECT | 62 | 63 | 64 | 65 |
| CONNECT | 63 |    |    |    |
| CONNECT | 64 |    |    |    |
| CONNECT | 65 |    |    |    |
| CONNECT | 66 | 67 | 68 | 69 |





---

---

| HEADER | CSD ENTRY [Fe(TPP)(2-MeHIm)] Table S4 |           |           |       |       |          |         |        |      |      |
|--------|---------------------------------------|-----------|-----------|-------|-------|----------|---------|--------|------|------|
| CRYST1 | 1.0000                                | 1.0000    | 1.0000    | 90.00 | 90.00 | 90.00    | Unknown |        |      |      |
| SCALE1 | 1.000000                              | -0.000000 | -0.000000 |       |       | 0.000000 |         |        |      |      |
| SCALE2 | 0.000000                              | 1.000000  | -0.000000 |       |       | 0.000000 |         |        |      |      |
| SCALE3 | 0.000000                              | 0.000000  | 1.000000  |       |       | 0.000000 |         |        |      |      |
| HETATM | 1                                     | Fe1       | UNK       | 0     | 1     | -0.017   | 0.002   | -0.017 | 1.00 | 0.00 |
| HETATM | 2                                     | N2        | UNK       | 0     | 1     | 0.749    | 1.912   | -0.313 | 1.00 | 0.00 |
| HETATM | 3                                     | N3        | UNK       | 0     | 1     | 1.914    | -0.771  | -0.265 | 1.00 | 0.00 |
| HETATM | 4                                     | N4        | UNK       | 0     | 1     | -0.780   | -1.904  | -0.383 | 1.00 | 0.00 |
| HETATM | 5                                     | N5        | UNK       | 0     | 1     | -1.946   | 0.775   | -0.318 | 1.00 | 0.00 |
| HETATM | 6                                     | C18       | UNK       | 0     | 1     | 3.168    | 1.359   | -0.464 | 1.00 | 0.00 |
| HETATM | 7                                     | C19       | UNK       | 0     | 1     | 1.350    | -3.183  | -0.318 | 1.00 | 0.00 |
| HETATM | 8                                     | C20       | UNK       | 0     | 1     | -3.207   | -1.351  | -0.446 | 1.00 | 0.00 |
| HETATM | 9                                     | C21       | UNK       | 0     | 1     | -1.385   | 3.184   | -0.305 | 1.00 | 0.00 |
| HETATM | 10                                    | C22       | UNK       | 0     | 1     | 0.024    | 3.080   | -0.286 | 1.00 | 0.00 |
| HETATM | 11                                    | C23       | UNK       | 0     | 1     | 2.079    | 2.259   | -0.379 | 1.00 | 0.00 |
| HETATM | 12                                    | C24       | UNK       | 0     | 1     | 3.068    | -0.048  | -0.453 | 1.00 | 0.00 |
| HETATM | 13                                    | C25       | UNK       | 0     | 1     | 2.251    | -2.099  | -0.365 | 1.00 | 0.00 |
| HETATM | 14                                    | C26       | UNK       | 0     | 1     | -0.061   | -3.074  | -0.305 | 1.00 | 0.00 |
| HETATM | 15                                    | C27       | UNK       | 0     | 1     | -2.113   | -2.247  | -0.379 | 1.00 | 0.00 |
| HETATM | 16                                    | C28       | UNK       | 0     | 1     | -3.110   | 0.056   | -0.446 | 1.00 | 0.00 |
| HETATM | 17                                    | C29       | UNK       | 0     | 1     | -2.287   | 2.104   | -0.369 | 1.00 | 0.00 |
| HETATM | 18                                    | C30       | UNK       | 0     | 1     | 0.930    | 4.205   | -0.311 | 1.00 | 0.00 |
| HETATM | 19                                    | H31       | UNK       | 0     | 1     | 0.637    | 5.245   | -0.301 | 1.00 | 0.00 |
| HETATM | 20                                    | C32       | UNK       | 0     | 1     | 2.196    | 3.700   | -0.362 | 1.00 | 0.00 |
| HETATM | 21                                    | H33       | UNK       | 0     | 1     | 3.123    | 4.254   | -0.392 | 1.00 | 0.00 |
| HETATM | 22                                    | C34       | UNK       | 0     | 1     | 4.179    | -0.958  | -0.667 | 1.00 | 0.00 |
| HETATM | 23                                    | H35       | UNK       | 0     | 1     | 5.199    | -0.664  | -0.868 | 1.00 | 0.00 |
| HETATM | 24                                    | C36       | UNK       | 0     | 1     | 3.677    | -2.220  | -0.607 | 1.00 | 0.00 |
| HETATM | 25                                    | H37       | UNK       | 0     | 1     | 4.210    | -3.148  | -0.754 | 1.00 | 0.00 |
| HETATM | 26                                    | C38       | UNK       | 0     | 1     | -0.973   | -4.192  | -0.222 | 1.00 | 0.00 |
| HETATM | 27                                    | H39       | UNK       | 0     | 1     | -0.687   | -5.229  | -0.126 | 1.00 | 0.00 |
| HETATM | 28                                    | C40       | UNK       | 0     | 1     | -2.237   | -3.683  | -0.272 | 1.00 | 0.00 |
| HETATM | 29                                    | H41       | UNK       | 0     | 1     | -3.167   | -4.230  | -0.226 | 1.00 | 0.00 |
| HETATM | 30                                    | C42       | UNK       | 0     | 1     | -4.231   | 0.970   | -0.581 | 1.00 | 0.00 |
| HETATM | 31                                    | H43       | UNK       | 0     | 1     | -5.263   | 0.681   | -0.719 | 1.00 | 0.00 |
| HETATM | 32                                    | C44       | UNK       | 0     | 1     | -3.726   | 2.231   | -0.516 | 1.00 | 0.00 |
| HETATM | 33                                    | H45       | UNK       | 0     | 1     | -4.269   | 3.162   | -0.582 | 1.00 | 0.00 |
| HETATM | 34                                    | C46       | UNK       | 0     | 1     | 4.537    | 1.950   | -0.615 | 1.00 | 0.00 |
| HETATM | 35                                    | C47       | UNK       | 0     | 1     | 5.510    | 1.784   | 0.384  | 1.00 | 0.00 |
| HETATM | 36                                    | H48       | UNK       | 0     | 1     | 5.259    | 1.222   | 1.279  | 1.00 | 0.00 |
| HETATM | 37                                    | C49       | UNK       | 0     | 1     | 6.786    | 2.332   | 0.242  | 1.00 | 0.00 |
| HETATM | 38                                    | H50       | UNK       | 0     | 1     | 7.522    | 2.195   | 1.030  | 1.00 | 0.00 |
| HETATM | 39                                    | C51       | UNK       | 0     | 1     | 7.115    | 3.058   | -0.905 | 1.00 | 0.00 |
| HETATM | 40                                    | H52       | UNK       | 0     | 1     | 8.108    | 3.485   | -1.016 | 1.00 | 0.00 |
| HETATM | 41                                    | C53       | UNK       | 0     | 1     | 6.159    | 3.229   | -1.908 | 1.00 | 0.00 |
| HETATM | 42                                    | H54       | UNK       | 0     | 1     | 6.406    | 3.786   | -2.808 | 1.00 | 0.00 |
| HETATM | 43                                    | C55       | UNK       | 0     | 1     | 4.883    | 2.680   | -1.764 | 1.00 | 0.00 |
| HETATM | 44                                    | H56       | UNK       | 0     | 1     | 4.145    | 2.809   | -2.551 | 1.00 | 0.00 |
| HETATM | 45                                    | C57       | UNK       | 0     | 1     | 1.937    | -4.561  | -0.328 | 1.00 | 0.00 |
| HETATM | 46                                    | C58       | UNK       | 0     | 1     | 2.745    | -5.003  | 0.733  | 1.00 | 0.00 |
| HETATM | 47                                    | H59       | UNK       | 0     | 1     | 2.930    | -4.335  | 1.570  | 1.00 | 0.00 |
| HETATM | 48                                    | C60       | UNK       | 0     | 1     | 3.301    | -6.283  | 0.727  | 1.00 | 0.00 |
| HETATM | 49                                    | H61       | UNK       | 0     | 1     | 3.918    | -6.607  | 1.560  | 1.00 | 0.00 |
| HETATM | 50                                    | C62       | UNK       | 0     | 1     | 3.060    | -7.147  | -0.344 | 1.00 | 0.00 |
| HETATM | 51                                    | H63       | UNK       | 0     | 1     | 3.493    | -8.144  | -0.350 | 1.00 | 0.00 |
| HETATM | 52                                    | C64       | UNK       | 0     | 1     | 2.261    | -6.720  | -1.407 | 1.00 | 0.00 |



---

|         |    |    |    |
|---------|----|----|----|
| CONNECT | 21 |    |    |
| CONNECT | 22 | 23 | 24 |
| CONNECT | 23 |    |    |
| CONNECT | 24 | 25 |    |
| CONNECT | 25 |    |    |
| CONNECT | 26 | 27 | 28 |
| CONNECT | 27 |    |    |
| CONNECT | 28 | 29 |    |
| CONNECT | 29 |    |    |
| CONNECT | 30 | 31 | 32 |
| CONNECT | 31 |    |    |
| CONNECT | 32 | 33 |    |
| CONNECT | 33 |    |    |
| CONNECT | 34 | 35 | 43 |
| CONNECT | 35 | 36 | 37 |
| CONNECT | 36 |    |    |
| CONNECT | 37 | 38 | 39 |
| CONNECT | 38 |    |    |
| CONNECT | 39 | 40 | 41 |
| CONNECT | 40 |    |    |
| CONNECT | 41 | 42 | 43 |
| CONNECT | 42 |    |    |
| CONNECT | 43 | 44 |    |
| CONNECT | 44 |    |    |
| CONNECT | 45 | 46 | 54 |
| CONNECT | 46 | 47 | 48 |
| CONNECT | 47 |    |    |
| CONNECT | 48 | 49 | 50 |
| CONNECT | 49 |    |    |
| CONNECT | 50 | 51 | 52 |
| CONNECT | 51 |    |    |
| CONNECT | 52 | 53 | 54 |
| CONNECT | 53 |    |    |
| CONNECT | 54 | 55 |    |
| CONNECT | 55 |    |    |
| CONNECT | 56 | 57 | 65 |
| CONNECT | 57 | 58 | 59 |
| CONNECT | 58 |    |    |
| CONNECT | 59 | 60 | 61 |
| CONNECT | 60 |    |    |
| CONNECT | 61 | 62 | 63 |
| CONNECT | 62 |    |    |
| CONNECT | 63 | 64 | 65 |
| CONNECT | 64 |    |    |
| CONNECT | 65 | 66 |    |
| CONNECT | 66 |    |    |
| CONNECT | 67 | 68 | 76 |
| CONNECT | 68 | 69 | 70 |
| CONNECT | 69 |    |    |
| CONNECT | 70 | 71 | 72 |
| CONNECT | 71 |    |    |
| CONNECT | 72 | 73 | 74 |
| CONNECT | 73 |    |    |
| CONNECT | 74 | 75 | 76 |
| CONNECT | 75 |    |    |
| CONNECT | 76 | 77 |    |
| CONNECT | 77 |    |    |



| HEADER | CSD ENTRY [Fe(TPP)(1,2-DiMeIm0] Tsblr S5 |           |           |       |       |          |         |        |      |      |
|--------|------------------------------------------|-----------|-----------|-------|-------|----------|---------|--------|------|------|
| CRYST1 | 1.0000                                   | 1.0000    | 1.0000    | 90.00 | 90.00 | 90.00    | Unknown |        |      |      |
| SCALE1 | 1.000000                                 | -0.000000 | -0.000000 |       |       | 0.000000 |         |        |      |      |
| SCALE2 | 0.000000                                 | 1.000000  | -0.000000 |       |       | 0.000000 |         |        |      |      |
| SCALE3 | 0.000000                                 | 0.000000  | 1.000000  |       |       | 0.000000 |         |        |      |      |
| HETATM | 1                                        | Fe1       | UNK       | 0     | 1     | -0.024   | 0.011   | -0.125 | 1.00 | 0.00 |
| HETATM | 2                                        | N2        | UNK       | 0     | 1     | -1.738   | 1.175   | -0.379 | 1.00 | 0.00 |
| HETATM | 3                                        | N3        | UNK       | 0     | 1     | 1.127    | 1.734   | -0.412 | 1.00 | 0.00 |
| HETATM | 4                                        | N4        | UNK       | 0     | 1     | 1.677    | -1.145  | -0.485 | 1.00 | 0.00 |
| HETATM | 5                                        | N5        | UNK       | 0     | 1     | -1.179   | -1.708  | -0.433 | 1.00 | 0.00 |
| HETATM | 6                                        | C21       | UNK       | 0     | 1     | -0.687   | 3.422   | -0.392 | 1.00 | 0.00 |
| HETATM | 7                                        | C22       | UNK       | 0     | 1     | 3.364    | 0.676   | -0.614 | 1.00 | 0.00 |
| HETATM | 8                                        | C23       | UNK       | 0     | 1     | 0.633    | -3.395  | -0.417 | 1.00 | 0.00 |
| HETATM | 9                                        | C24       | UNK       | 0     | 1     | -3.417   | -0.646  | -0.576 | 1.00 | 0.00 |
| HETATM | 10                                       | C25       | UNK       | 0     | 1     | -3.025   | 0.711   | -0.517 | 1.00 | 0.00 |
| HETATM | 11                                       | C26       | UNK       | 0     | 1     | -1.796   | 2.546   | -0.410 | 1.00 | 0.00 |
| HETATM | 12                                       | C27       | UNK       | 0     | 1     | 0.667    | 3.028   | -0.433 | 1.00 | 0.00 |
| HETATM | 13                                       | C28       | UNK       | 0     | 1     | 2.494    | 1.787   | -0.556 | 1.00 | 0.00 |
| HETATM | 14                                       | C29       | UNK       | 0     | 1     | 2.970    | -0.681  | -0.561 | 1.00 | 0.00 |
| HETATM | 15                                       | C30       | UNK       | 0     | 1     | 1.740    | -2.518  | -0.450 | 1.00 | 0.00 |
| HETATM | 16                                       | C31       | UNK       | 0     | 1     | -0.723   | -3.001  | -0.445 | 1.00 | 0.00 |
| HETATM | 17                                       | C32       | UNK       | 0     | 1     | -2.548   | -1.759  | -0.543 | 1.00 | 0.00 |
| HETATM | 18                                       | C33       | UNK       | 0     | 1     | -3.930   | 1.836   | -0.633 | 1.00 | 0.00 |
| HETATM | 19                                       | H34       | UNK       | 0     | 1     | -4.999   | 1.768   | -0.777 | 1.00 | 0.00 |
| HETATM | 20                                       | C35       | UNK       | 0     | 1     | -3.173   | 2.966   | -0.560 | 1.00 | 0.00 |
| HETATM | 21                                       | H36       | UNK       | 0     | 1     | -3.511   | 3.989   | -0.633 | 1.00 | 0.00 |
| HETATM | 22                                       | C37       | UNK       | 0     | 1     | 1.791    | 3.935   | -0.554 | 1.00 | 0.00 |
| HETATM | 23                                       | H38       | UNK       | 0     | 1     | 1.726    | 5.013   | -0.582 | 1.00 | 0.00 |
| HETATM | 24                                       | C39       | UNK       | 0     | 1     | 2.913    | 3.172   | -0.651 | 1.00 | 0.00 |
| HETATM | 25                                       | H40       | UNK       | 0     | 1     | 3.930    | 3.512   | -0.786 | 1.00 | 0.00 |
| HETATM | 26                                       | C41       | UNK       | 0     | 1     | 3.884    | -1.804  | -0.543 | 1.00 | 0.00 |
| HETATM | 27                                       | H42       | UNK       | 0     | 1     | 4.961    | -1.736  | -0.574 | 1.00 | 0.00 |
| HETATM | 28                                       | C43       | UNK       | 0     | 1     | 3.126    | -2.934  | -0.466 | 1.00 | 0.00 |
| HETATM | 29                                       | H44       | UNK       | 0     | 1     | 3.475    | -3.955  | -0.422 | 1.00 | 0.00 |
| HETATM | 30                                       | C45       | UNK       | 0     | 1     | -1.848   | -3.908  | -0.555 | 1.00 | 0.00 |
| HETATM | 31                                       | H46       | UNK       | 0     | 1     | -1.783   | -4.986  | -0.601 | 1.00 | 0.00 |
| HETATM | 32                                       | C47       | UNK       | 0     | 1     | -2.973   | -3.144  | -0.608 | 1.00 | 0.00 |
| HETATM | 33                                       | H48       | UNK       | 0     | 1     | -3.995   | -3.483  | -0.692 | 1.00 | 0.00 |
| HETATM | 34                                       | C49       | UNK       | 0     | 1     | -0.985   | 4.891   | -0.392 | 1.00 | 0.00 |
| HETATM | 35                                       | C50       | UNK       | 0     | 1     | -1.527   | 5.507   | 0.748  | 1.00 | 0.00 |
| HETATM | 36                                       | H51       | UNK       | 0     | 1     | -1.720   | 4.905   | 1.632  | 1.00 | 0.00 |
| HETATM | 37                                       | C52       | UNK       | 0     | 1     | -1.813   | 6.873   | 0.757  | 1.00 | 0.00 |
| HETATM | 38                                       | H53       | UNK       | 0     | 1     | -2.229   | 7.331   | 1.651  | 1.00 | 0.00 |
| HETATM | 39                                       | C54       | UNK       | 0     | 1     | -1.563   | 7.649   | -0.377 | 1.00 | 0.00 |
| HETATM | 40                                       | H55       | UNK       | 0     | 1     | -1.786   | 8.713   | -0.371 | 1.00 | 0.00 |
| HETATM | 41                                       | C56       | UNK       | 0     | 1     | -1.028   | 7.050   | -1.518 | 1.00 | 0.00 |
| HETATM | 42                                       | H57       | UNK       | 0     | 1     | -0.837   | 7.644   | -2.408 | 1.00 | 0.00 |
| HETATM | 43                                       | C58       | UNK       | 0     | 1     | -0.743   | 5.683   | -1.526 | 1.00 | 0.00 |
| HETATM | 44                                       | H59       | UNK       | 0     | 1     | -0.336   | 5.217   | -2.418 | 1.00 | 0.00 |
| HETATM | 45                                       | C60       | UNK       | 0     | 1     | 4.830    | 0.956   | -0.760 | 1.00 | 0.00 |
| HETATM | 46                                       | C61       | UNK       | 0     | 1     | 5.559    | 1.575   | 0.269  | 1.00 | 0.00 |
| HETATM | 47                                       | H62       | UNK       | 0     | 1     | 5.047    | 1.852   | 1.186  | 1.00 | 0.00 |
| HETATM | 48                                       | C63       | UNK       | 0     | 1     | 6.923    | 1.832   | 0.128  | 1.00 | 0.00 |
| HETATM | 49                                       | H64       | UNK       | 0     | 1     | 7.468    | 2.309   | 0.939  | 1.00 | 0.00 |
| HETATM | 50                                       | C65       | UNK       | 0     | 1     | 7.588    | 1.474   | -1.047 | 1.00 | 0.00 |
| HETATM | 51                                       | H66       | UNK       | 0     | 1     | 8.650    | 1.674   | -1.157 | 1.00 | 0.00 |
| HETATM | 52                                       | C67       | UNK       | 0     | 1     | 6.877    | 0.858   | -2.079 | 1.00 | 0.00 |



---

|         |    |    |    |
|---------|----|----|----|
| CONNECT | 18 | 19 | 20 |
| CONNECT | 19 |    |    |
| CONNECT | 20 | 21 |    |
| CONNECT | 21 |    |    |
| CONNECT | 22 | 23 | 24 |
| CONNECT | 23 |    |    |
| CONNECT | 24 | 25 |    |
| CONNECT | 25 |    |    |
| CONNECT | 26 | 27 | 28 |
| CONNECT | 27 |    |    |
| CONNECT | 28 | 29 |    |
| CONNECT | 29 |    |    |
| CONNECT | 30 | 31 | 32 |
| CONNECT | 31 |    |    |
| CONNECT | 32 | 33 |    |
| CONNECT | 33 |    |    |
| CONNECT | 34 | 35 | 43 |
| CONNECT | 35 | 36 | 37 |
| CONNECT | 36 |    |    |
| CONNECT | 37 | 38 | 39 |
| CONNECT | 38 |    |    |
| CONNECT | 39 | 40 | 41 |
| CONNECT | 40 |    |    |
| CONNECT | 41 | 42 | 43 |
| CONNECT | 42 |    |    |
| CONNECT | 43 | 44 |    |
| CONNECT | 44 |    |    |
| CONNECT | 45 | 46 | 54 |
| CONNECT | 46 | 47 | 48 |
| CONNECT | 47 |    |    |
| CONNECT | 48 | 49 | 50 |
| CONNECT | 49 |    |    |
| CONNECT | 50 | 51 | 52 |
| CONNECT | 51 |    |    |
| CONNECT | 52 | 53 | 54 |
| CONNECT | 53 |    |    |
| CONNECT | 54 | 55 |    |
| CONNECT | 55 |    |    |
| CONNECT | 56 | 57 | 65 |
| CONNECT | 57 | 58 | 59 |
| CONNECT | 58 |    |    |
| CONNECT | 59 | 60 | 61 |
| CONNECT | 60 |    |    |
| CONNECT | 61 | 62 | 63 |
| CONNECT | 62 |    |    |
| CONNECT | 63 | 64 | 65 |
| CONNECT | 64 |    |    |
| CONNECT | 65 | 66 |    |
| CONNECT | 66 |    |    |
| CONNECT | 67 | 68 | 76 |
| CONNECT | 68 | 69 | 70 |
| CONNECT | 69 |    |    |
| CONNECT | 70 | 71 | 72 |
| CONNECT | 71 |    |    |
| CONNECT | 72 | 73 | 74 |
| CONNECT | 73 |    |    |
| CONNECT | 74 | 75 | 76 |
